# Supplementary material
Source: PubMed Central journal article supplement (PMC154316)
Supplement: pnas_0834959100_4.pdf [file pnas_0834959100_4.pdf]

**Table 1. Net charge and pI of band 3 peptides**

| Peptide | Net charge | pI    |
|---------|------------|-------|
| 1       | +0.91      | 9.01  |
| 2       | -1.12      | 4.44  |
| 3A      | +2.07      | 9.46  |
| 3B      | +1.91      | 9.59  |
| 4A      | -0.09      | 6.07  |
| 4B      | +1.08      | 9.00  |
| 4C      | +1.08      | 9.90  |
| 5A      | +1.08      | 10.05 |
| 5B      | +1.07      | 9.00  |
| 5C      | +0.91      | 8.84  |
| 6A      | +2.07      | 9.46  |
| 6B      | +4.07      | 11.16 |
