# Supplementary material
Source: PubMed Central journal article supplement (PMC154316)
Supplement: pnas_0834959100_9.pdf [file pnas_0834959100_9.pdf]

**Table 2. Summary of yeast two-hybrid assay**

| Fusion to DNA-binding domain<br>(DNA-BD) /pGBKT7 vector | Fusion to activation domain<br>(AD) /pGADT7 vector | Binding<br>property |
|---------------------------------------------------------|----------------------------------------------------|---------------------|
| CONTROL                                                 |                                                    |                     |
| None                                                    | None                                               | –                   |
| p53                                                     | None                                               | –                   |
| None                                                    | SV40 large T-antigen                               | –                   |
| p53                                                     | SV40 large T-antigen                               | +++                 |
| Lamin C                                                 | SV40 large T-antigen                               | –                   |
| 5ABC                                                    | SV40 large T-antigen                               | –                   |
| 5BC                                                     | SV40 large T-antigen                               | –                   |
| 6AB                                                     | SV40 large T-antigen                               | –                   |
| Lamin C                                                 | MSP1 <sub>38a</sub>                                | –                   |
| Lamin C                                                 | MSP1 <sub>38b</sub>                                | –                   |
| Lamin C                                                 | MSP1 <sub>42</sub>                                 | –                   |
| p53                                                     | MSP1 <sub>42</sub>                                 | –                   |
| p53                                                     | MSP1 <sub>19</sub>                                 | –                   |
| EXPERIMENTAL                                            |                                                    |                     |
| 5ABC                                                    | MSP1 <sub>38a</sub>                                | –                   |
| 5ABC                                                    | MSP1 <sub>38b</sub>                                | +                   |
| 5ABC                                                    | MSP1 <sub>42</sub>                                 | +++                 |
| 5ABC                                                    | MSP1 <sub>19</sub>                                 | +++                 |
| 5BC                                                     | MSP1 <sub>38a</sub>                                | ++                  |
| 5BC                                                     | MSP1 <sub>38b</sub>                                | –                   |
| 5BC                                                     | MSP1 <sub>42</sub>                                 | –                   |
| 5BC                                                     | MSP1 <sub>19</sub>                                 | –                   |
| 6AB                                                     | MSP1 <sub>38a</sub>                                | –                   |
| 6AB                                                     | MSP1 <sub>38b</sub>                                | –                   |
| 6AB                                                     | MSP1 <sub>42</sub>                                 | +++                 |
| 6AB                                                     | MSP1 <sub>19</sub>                                 | +++                 |
