# Supplementary material
Source: PubMed Central journal article supplement (PMC154316)

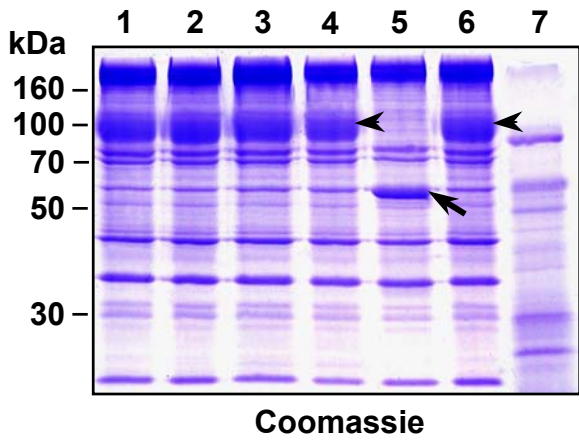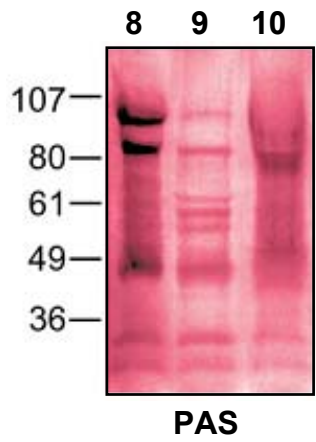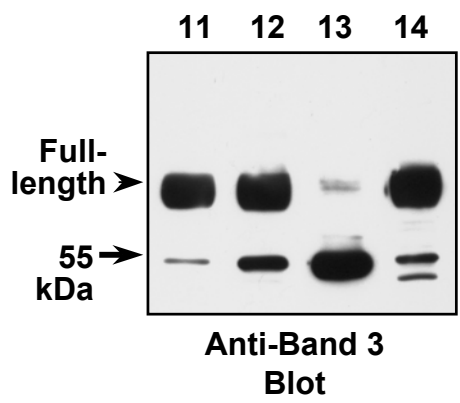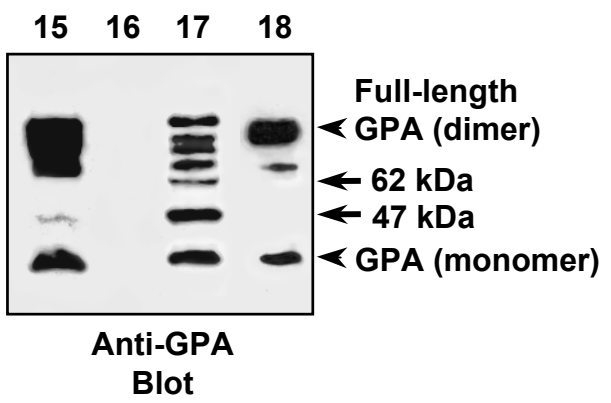

Supplement: pnas_0834959100_11.pdf [file pnas_0834959100_11.pdf]

<sup>3</sup>H-Hypoxanthine Incorporation (CPM)

**A**

**Peptide 5C**

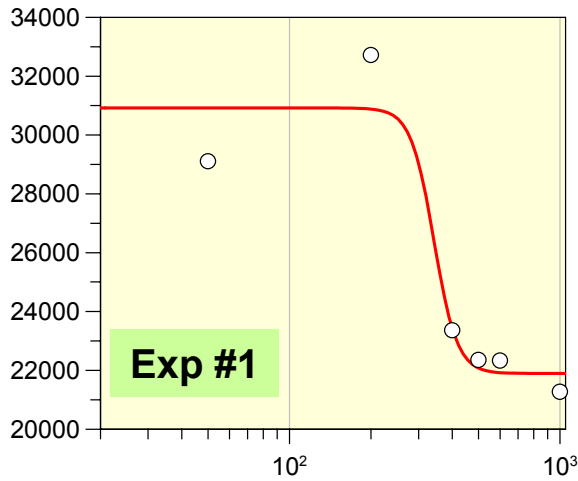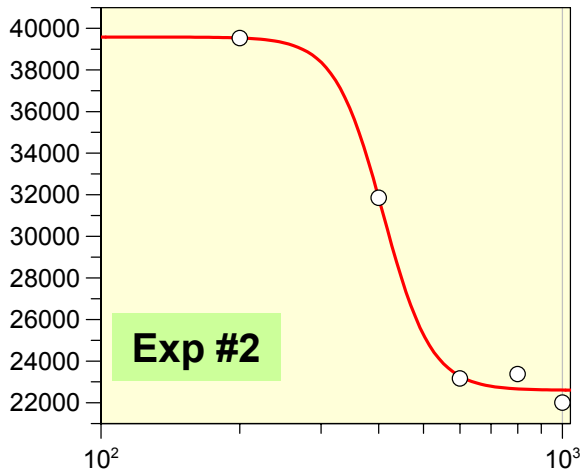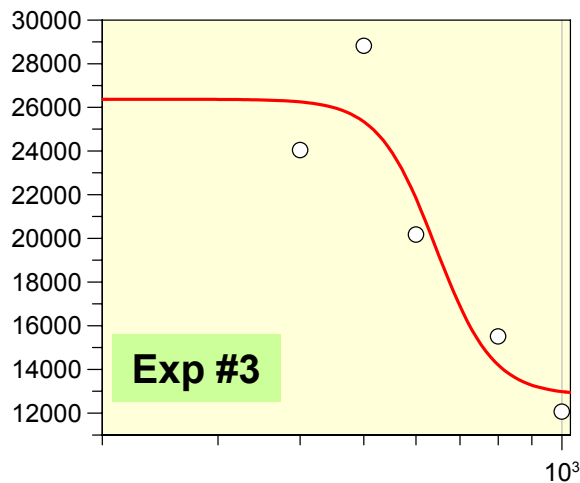

**B**

**Peptide 6A**

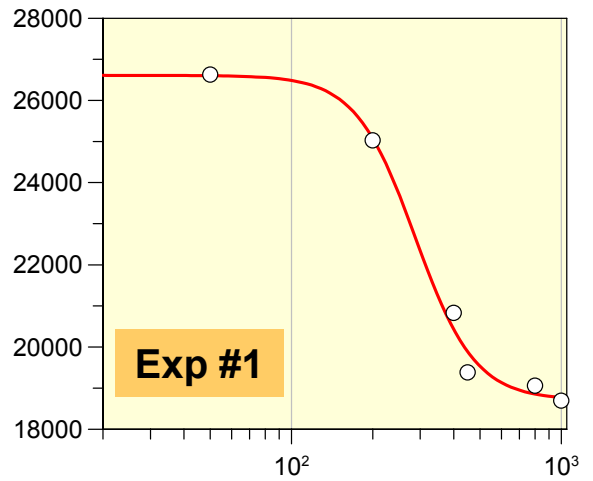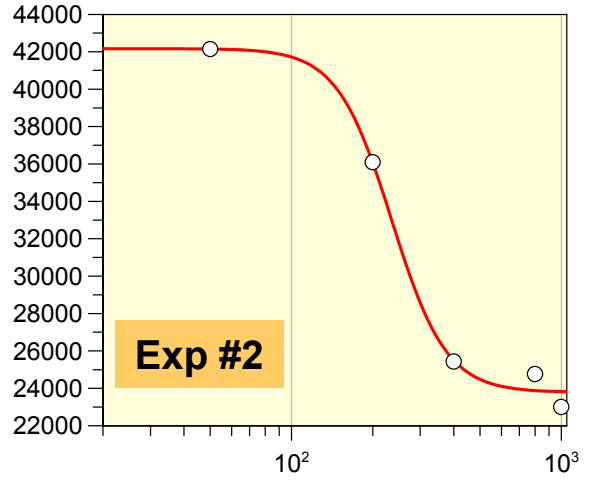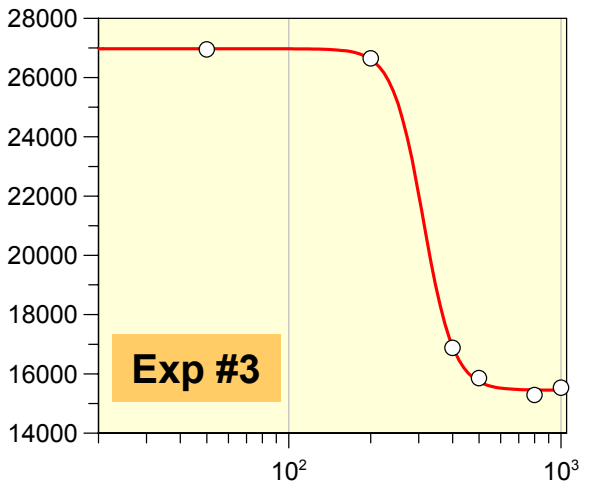

**Peptide Concentration (µM)**

Supplement: pnas_0834959100_3.pdf [file pnas_0834959100_3.pdf]

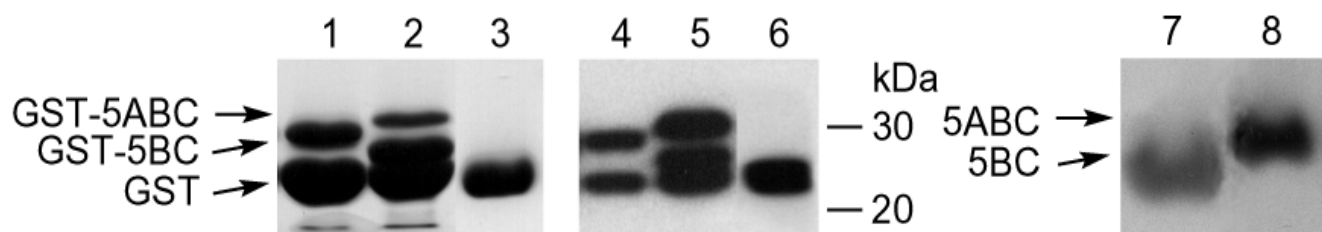

Supplement: pnas_0834959100_6.pdf [file pnas_0834959100_6.pdf]

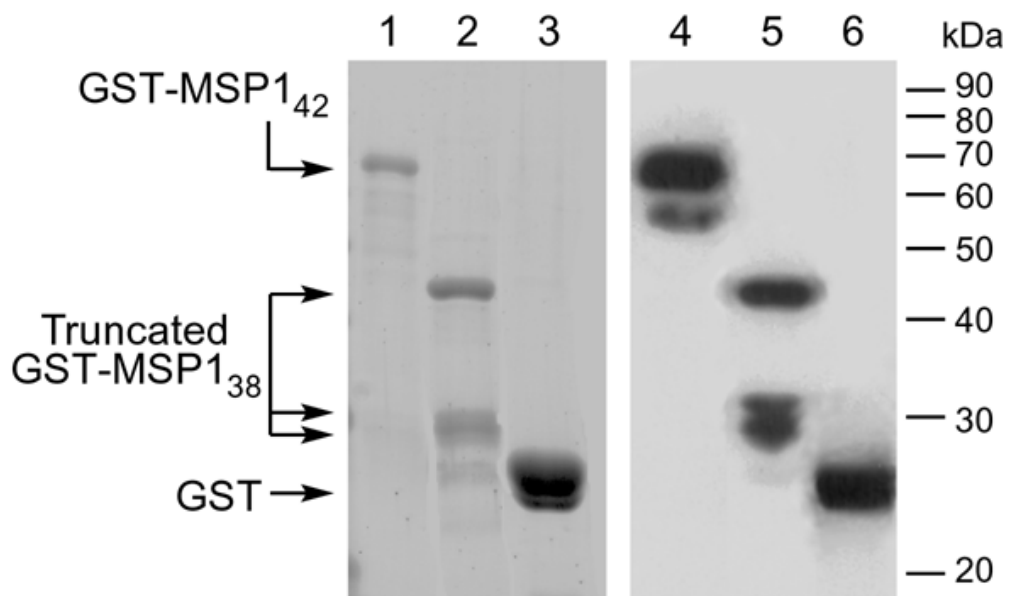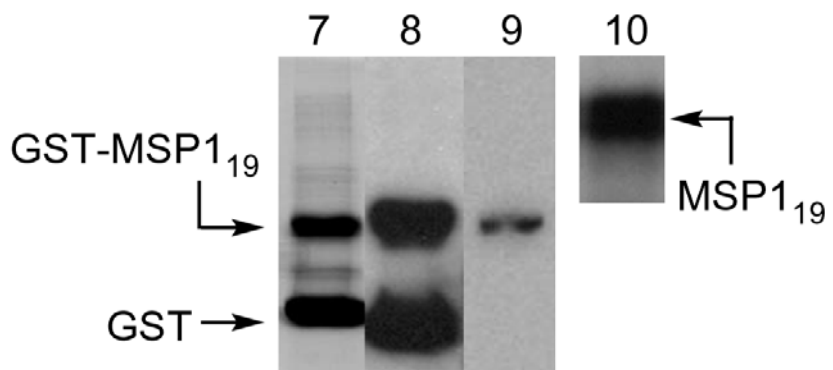

Supplement: pnas_0834959100_8.pdf [file pnas_0834959100_8.pdf]
